# Supplementary material for: Ultrahigh overall-performance phase-change memory by yttrium dragging
Source: Royal Society of Chemistry journal article supplement (doi:10.1039/d2tc04538a), 2022-12-22
Supplement: d2tc04538a1.pdf [file d2tc04538a1.pdf]

## Supplementary materials

### **Ultra-high overall-performance phase-change memory by yttrium dragging**

Bin Liu<sup>a†</sup>, Kaiqi Li<sup>b†</sup>, Jian Zhou<sup>b</sup>, Liangcai Wu<sup>c</sup>, Zhitang Song<sup>d</sup>, Weisheng Zhao<sup>a</sup>, Stephen R.

Elliott<sup>b,e,f</sup> and Zhimei Sun<sup>b\*</sup>

<sup>a</sup> School of Integrated Circuit Science and Engineering, Beihang University, Beijing 100191, China

<sup>b</sup> School of Materials Science and Engineering, Beihang University, Beijing 100191, China

<sup>c</sup> College of Science, Donghua University, Shanghai 201620, China

<sup>d</sup> State Key Laboratory of Functional Materials for Informatics, Shanghai Institute of Microsystem and Information Technology, Chinese Academy of Sciences, 865 Changning Road, Shanghai 200050, China

<sup>e</sup> Department of Chemistry, University of Cambridge, Cambridge CB2 1EW, UK

<sup>f</sup> Physical and Theoretical Chemistry Laboratory, University of Oxford, Oxford OX1 3QZ, UK

†Contributions: The two authors contributed equally to this work.

\*Corresponding author: Zhimei Sun (zmsun@buaa.edu.cn)

## Supplementary Notes

### The protocol for generating an amorphous model

Three models of amorphous  $\text{Sb}_2\text{Te}_3$ ,  $\text{Y}_{0.037}\text{Sb}_{2-0.037}\text{Te}_3$  (abbreviated to  $\text{Y}_{3.7\%}\text{-Sb-Te}$ ), and  $\text{Y}_{0.087}\text{Sb}_{2-0.087}\text{Te}_3$  (abbreviated to  $\text{Y}_{8.7\%}\text{-Sb-Te}$ ) were generated using AIMD for simulation boxes with periodic boundary conditions. The total number of atoms in each model was 180. The density of the three models was  $5.65 \text{ g/cm}^3$  for  $\text{Sb}_2\text{Te}_3$ <sup>1</sup>,  $5.62 \text{ g/cm}^3$  for  $\text{Y}_{3.7\%}\text{-Sb-Te}$ <sup>2</sup>, and  $5.55 \text{ g/cm}^3$  for  $\text{Y}_{8.7\%}\text{-Sb-Te}$ , respectively. 180-atom rocksalt models of  $\text{Sb}_2\text{Te}_3$ ,  $\text{Y}_{3.7\%}\text{-Sb-Te}$ , and  $\text{Y}_{8.7\%}\text{-Sb-Te}$ , in which the Y atoms substitute for Sb atom in the cation sites, were first heated at 3000 K over 20 ps for disordering, then equilibrated at 1000 K over 30 ps to obtain a liquid structure. Subsequently, the liquid model was quenched down to 300 K using an annealing formula. The annealing expression is  $T_{\text{end}} = T_{\text{start}} \times \alpha^{\text{time}}$ , in which  $\alpha$  is the annealing factor. The  $\alpha$  parameter is 0.99998 in this work, and the average quenching rate is about 9 K/ps. The obtained amorphous models were equilibrated at 300 K for 270 ps. Then, the trajectories on the last 250 ps were used to study the evolution of the internal structural stress.

1. S. Caravati, M. Bernasconi and M. Parrinello, *Phys. Rev. B*, 2010, **81**, 014201.
2. Y. Zhou, L. Sun, G. M. Zewdie, R. Mazzarello, V. L. Deringer, E. Ma and W. Zhang, *J. Mater. Chem. C*, 2020, **8**, 3646-3654.

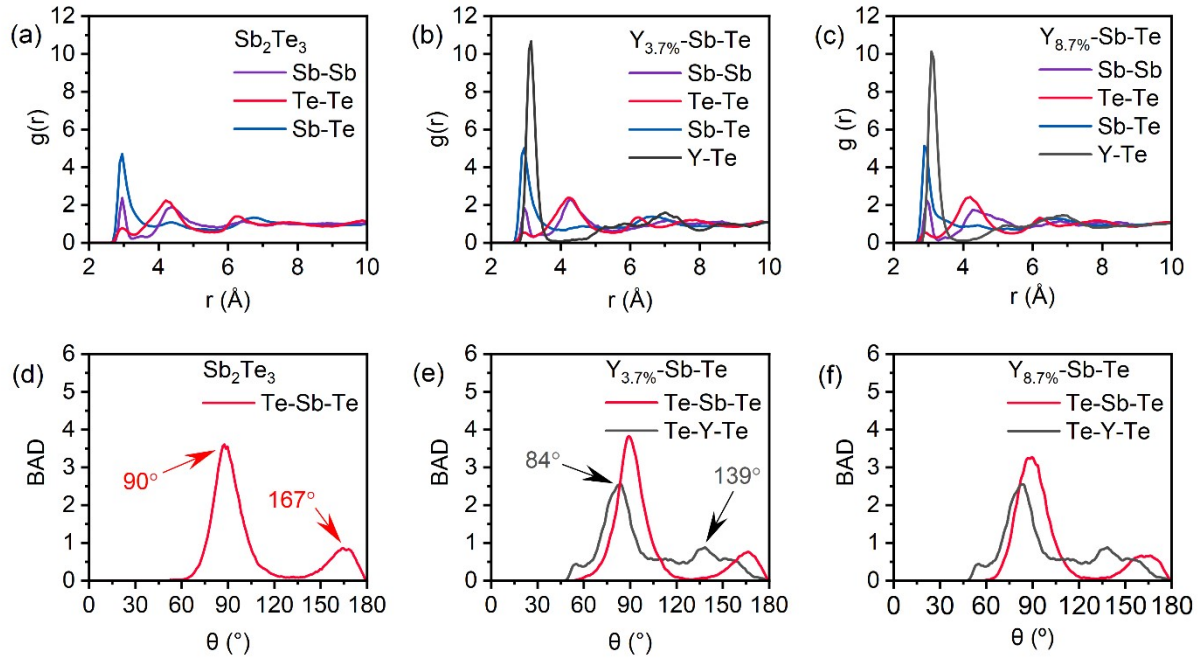

**Fig. S1.** (a)-(c) The radial distribution function,  $g(r)$ , of  $\text{Sb}_2\text{Te}_3$ ,  $\text{Y}_{3.7\%}\text{-Sb-Te}$ , and  $\text{Y}_{8.7\%}\text{-Sb-Te}$  glasses. The cutoff radius for calculating coordination numbers was 3.4 Å for Sb-Te, 3.3 Å for Sb-Sb, 3.2 Å for Te-Te, 3.4 Å for Y-Te, 3.3 Å for Y-Sb, and 3.3 Å for Y-Y, which is the first minimum in the  $g(r)$ ; (d)-(f) The bond-angle distribution of  $\text{Sb}_2\text{Te}_3$ ,  $\text{Y}_{3.7\%}\text{-Sb-Te}$ , and  $\text{Y}_{8.7\%}\text{-Sb-Te}$  glasses. The main angle of Te-Sb-Te units is  $90^\circ$  and  $167^\circ$ , whereas the main angle of Te-Y-Te is  $84^\circ$  and  $139^\circ$ , indicating the different local motifs around Y and Sb atoms.

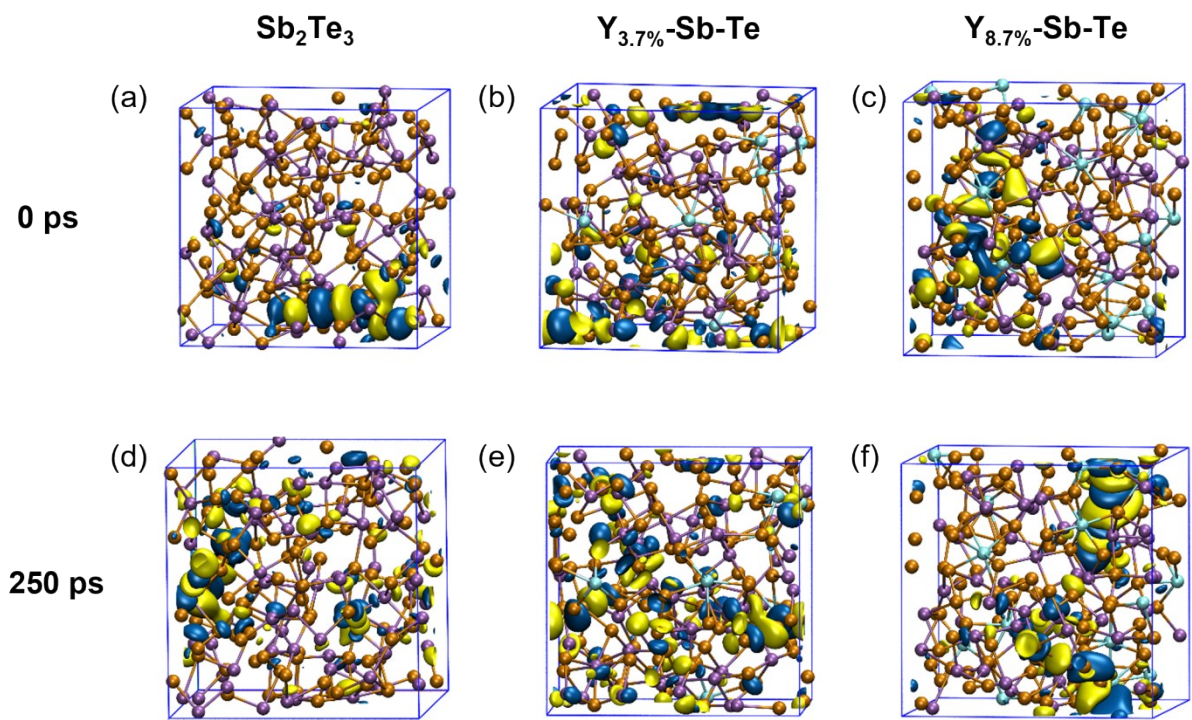

**Fig. S2.** Isosurfaces for the lowest unoccupied conduction-band state for  $\text{Sb}_2\text{Te}_3$ ,  $\text{Y}_{3.7\%}\text{-Sb-Te}$ , and  $\text{Y}_{8.7\%}\text{-Sb-Te}$  glasses at 0 ps (a)-(c) and 250 ps (d)-(f), with positive values shown in yellow, and negative values in blue. The isosurface value is  $\pm 0.015 \text{ e/bohr}^3$ . Sb atoms are shown in purple, Te atoms are shown in orange, and Y atoms are shown in navy blue.

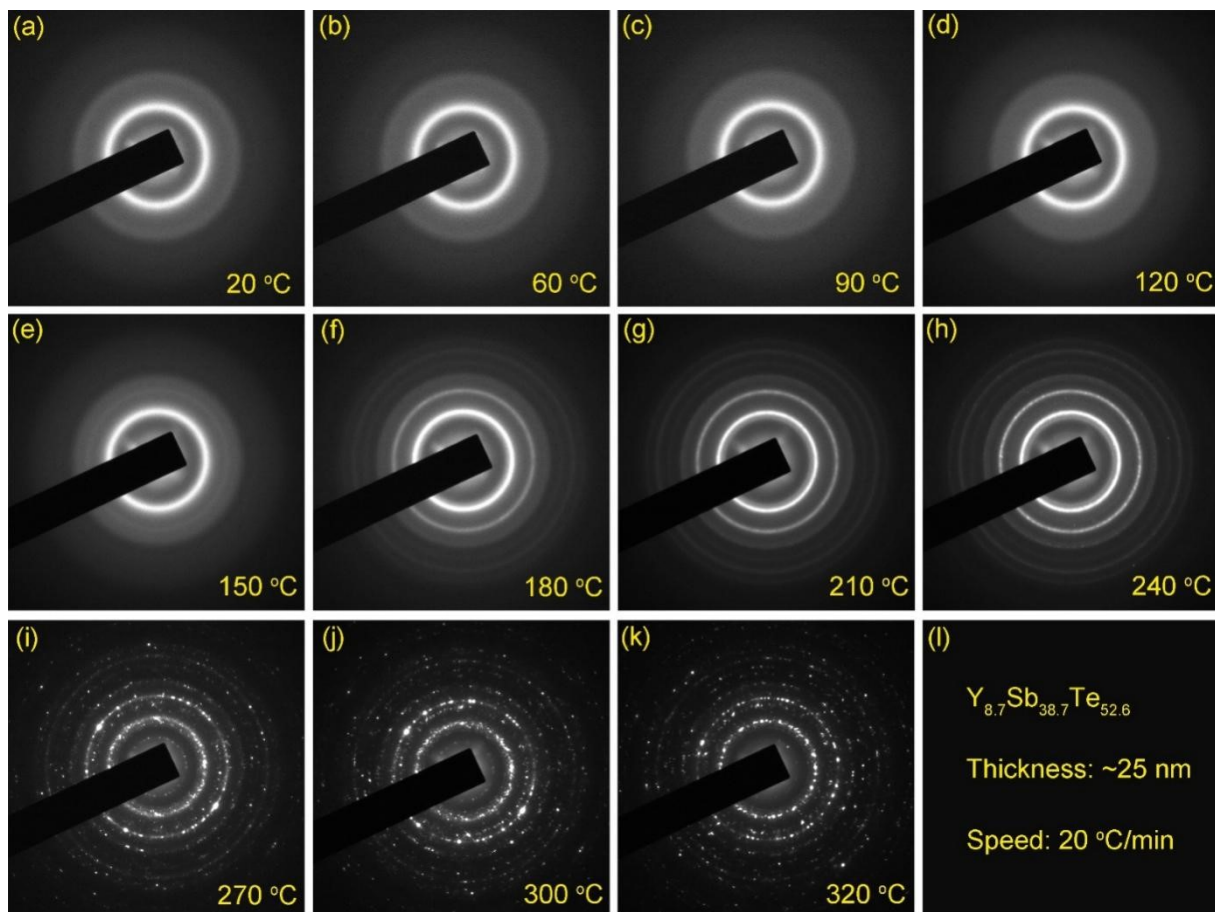

**Fig. S3.** TEM diffraction patterns of a  $\text{Y}_{8.7}\text{Sb}_{38.7}\text{Te}_{52.6}$  film upon *in situ* thermally-induced crystallization. The transition temperature from the amorphous to the cubic phase ( $T_c$ ) is  $\sim 180$  °C, and that from the cubic to the hexagonal phase is about 270 °C.

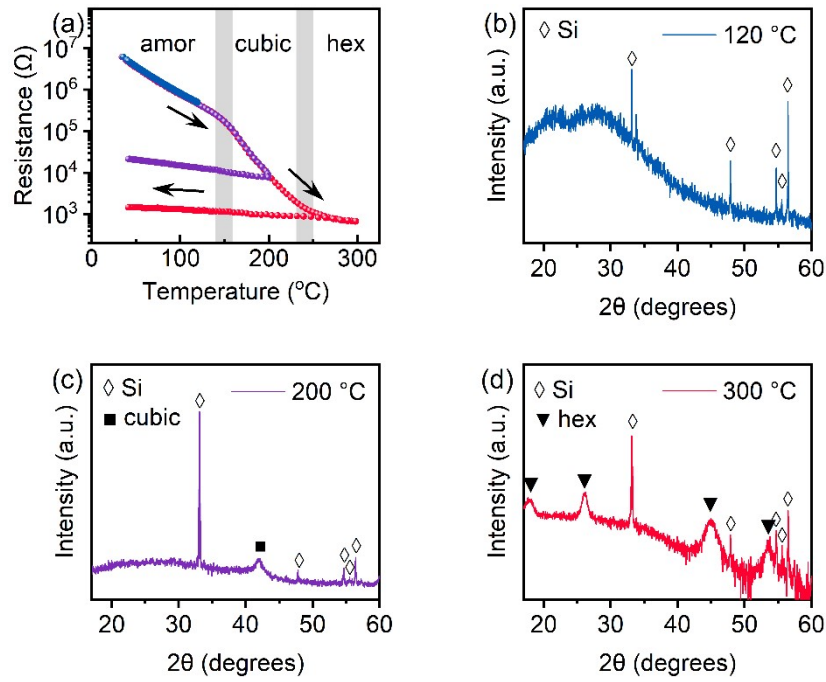

**Fig. S4.** (a) Temperature dependence of the electrical resistance ( $R-T$ ) of  $\sim 40$  nm-thick  $Y_{8.7}Sb_{38.7}Te_{52.6}$  films with different cut-off temperatures (120  $^{\circ}C$ , 200  $^{\circ}C$ , and 300  $^{\circ}C$ , respectively); (b)-(d) XRD patterns of the three  $Y_{8.7}Sb_{38.7}Te_{52.6}$  films after  $R-T$  measurements in (a).
